# Supplementary material
Source: PubMed Central journal article supplement (PMC4746682)
Supplement: supp_tpc.15.00791_TPC2015-00791-RAR1_Supplemental_Data_pdf.pdf [file supp_tpc.15.00791_TPC2015-00791-RAR1_Supplemental_Data_pdf.pdf]

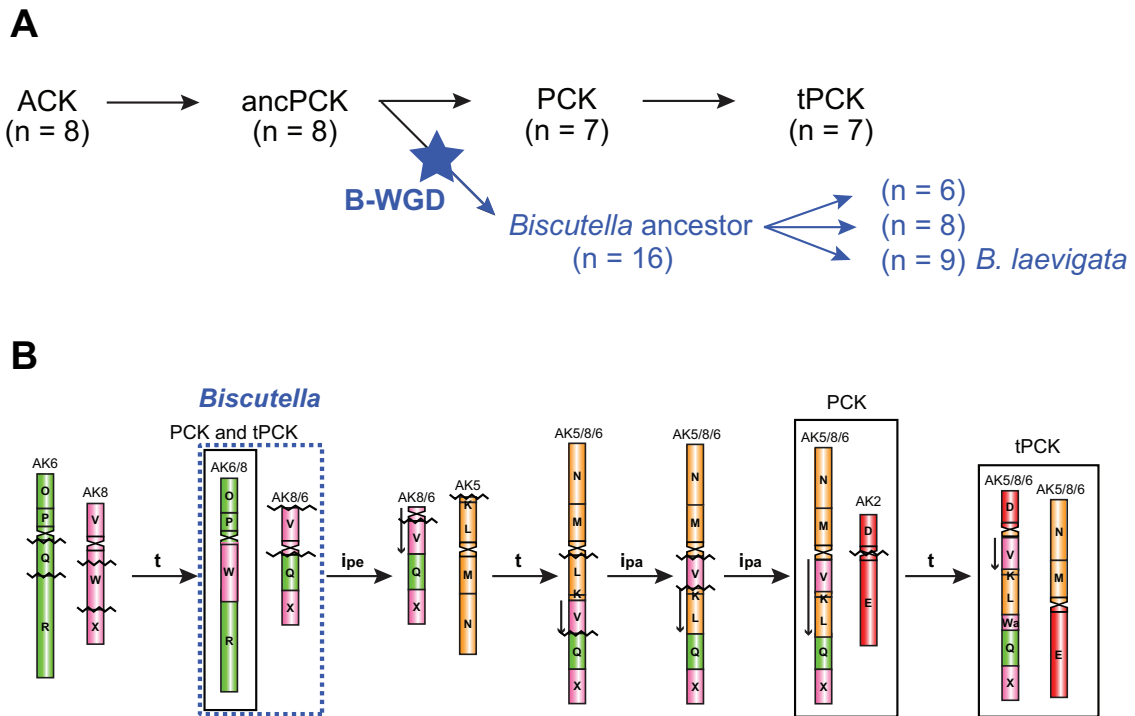

Supplemental Figure 1: Tentative scenario of genome evolution in *Biscutella* from the ancestral crucifer karyotype (ACK). (A) The ancestral proto-Calepineae karyotype (PCK; i.e. ancPCK; n = 8) presumably diverged from ACK through rearrangements involving chromosomes AK6 and AK8. This n = 8 genome has undergone the Bl-m-WGD event leading to an ancestral mesotetraploid *Biscutella* genome (n = 16), altered by genome fractionation and descending dysploidies towards the modern diploidized genomes of *Biscutella* species with n = 9, 8, and 6. In the extended lineage II, the ancPCK has undergone chromosome rearrangements leading to the origin of PCK and tPCK genomes (n = 7). (B) Chromosome rearrangements underlying the origin of ancestral genomes of ancPCK/*Biscutella* (n = 8), PCK (n = 7) and tPCK (n = 7) from the older ACK genome (n = 8). *Biscutella* chromosome Bv5 (O1/P1/W1/R1) and several ACK-like genomic block associations link the modern *B. laevigata* genome with both the ACK (n = 8) and the ancestor of the PCK (n = 7). A reciprocal translocation between ACK-specific chromosomes AK6 and AK8 led to the origin of AK6/8 chromosome present in *Biscutella* as well as in PCK and tPCK. Subsequent rearrangements involving chromosomes AK8/6, AK5 and AK2 led to the further differentiation of PCK and tPCK genome, respectively. t: translocation, ipe: pericentric inversion, ipa: paracentric inversion.

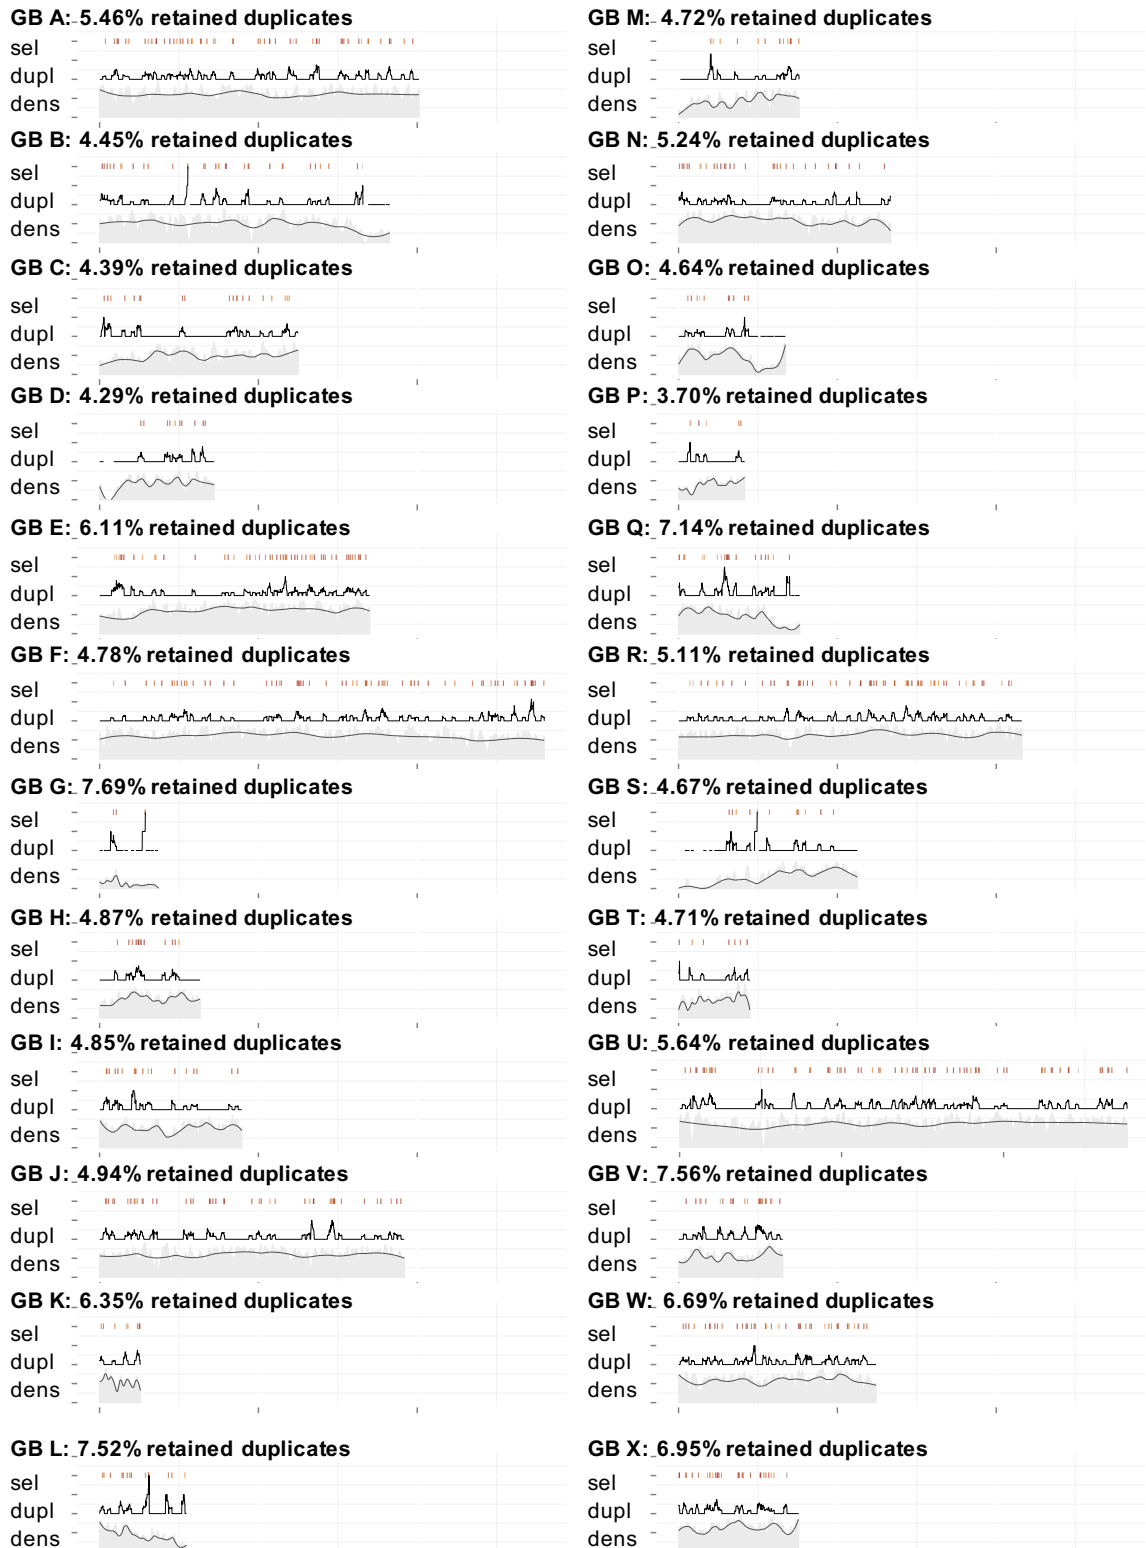

Supplemental Figure 2: Transcriptome data of *Biscutella leavigata* along each genomic block (GB) A to X. The density of transcripts (dens) and of retained duplicates (dupl) was computed in sliding windows of 40 *Arabidopsis* genes. Evidence of soft (light red) to strong (dark red) purifying selection (sel) based on the  $K_a/K_s$  ratio is indicated for each retained duplicate. % retained duplicates is the proportion of unigenes present in the transcriptome that showed evidence of BI-m-duplicates.

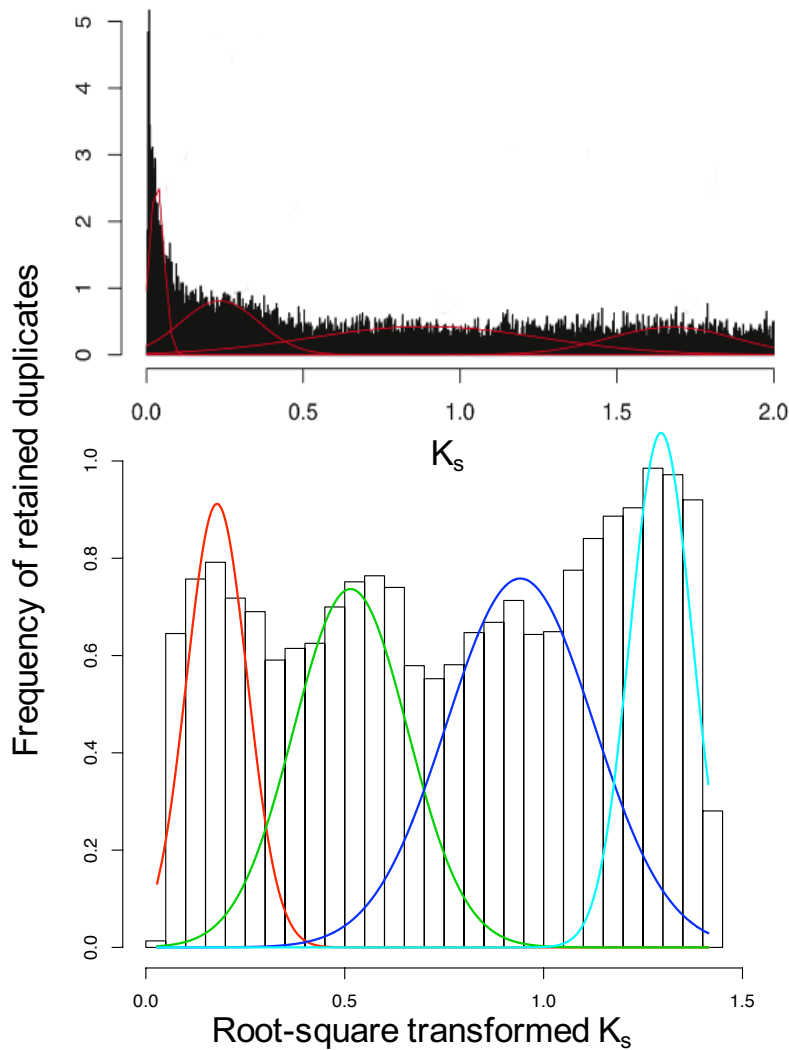

21

| WGD event          | <b>n</b>             | <b>m</b>             | <b>α</b>             | <b>β</b>             |
|--------------------|----------------------|----------------------|----------------------|----------------------|
| Mean $K_s$         | <b>0.032 ± 0.001</b> | <b>0.235 ± 0.003</b> | <b>0.886 ± 0.010</b> | <b>1.678 ± 0.006</b> |
| Standard deviation | <b>0.023 ± 0.001</b> | <b>0.121 ± 0.003</b> | <b>0.366 ± 0.010</b> | <b>0.198 ± 0.004</b> |

Supplemental Figure 3: Distribution of synonymous substitutions ( $K_s$  and root-square transformed  $K_s$ ) between pairs of duplicated transcripts in Buckler Mustards (*Biscutella laevigata* subsp. *laevigata*;  $2n = 4x = 36$ ). The curves represent a mixture of normal distributions fitted to the overall  $K_s$  distribution of transcripts larger than 450 bp with  $0 \leq K_s \leq 2$ . Mixture models on both root-squared  $K_s$  and  $K_s$  yielded similar results. The table (Table 1) presents means and standard errors of significant peaks based on  $K_s$  after 100 bootstrap computations.

Supplemental Table 1: Sequenced cDNA libraries of *Biscutella laevigata* subsp *laevigata*, using Roche 454 GS FLX Titanium and SOLiD 5500 xl

| Library               | Organs         | Individuals <sup>a</sup> | Number of reads |
|-----------------------|----------------|--------------------------|-----------------|
| 454 (standardized)    | Leaves & roots | Ab                       | 270,469         |
| SOLiD1 (quantitative) | Leaves & roots | Ca                       | 17,123,098      |
| SOLiD2 (quantitative) | Leaves & roots | Bj                       | 20,662,107      |
| SOLiD3 (quantitative) | Leaves         | Ab                       | 16,621,814      |
| SOLiD4 (quantitative) | Leaves         | Ab                       | 14,131,769      |
| SOLiD5 (quantitative) | Roots          | Bd                       | 10,182,227      |
| SOLiD6 (quantitative) | Roots          | Bd                       | 35,266,604      |

<sup>a</sup>Selected from Parisod & Christin, 2008, New Phytologist 178: 436–447

Supplemental Table 2: Iterative hybrid assembly of cDNA libraries detailed in Table S1 to infer the *Biscutella laevigata* subsp *laevigata* transcriptome, with summary statistics of resulting contigs.

| Assembly step | Total number of contigs | Number of large contigs <sup>a</sup> | Largest contig (bp) <sup>b</sup> | Coverage long reads <sup>b,c</sup> | Coverage short reads <sup>b,c</sup> |
|---------------|-------------------------|--------------------------------------|----------------------------------|------------------------------------|-------------------------------------|
| 1             | 404,105                 | 15,772                               | 3,692                            | 4.75                               | 24.64                               |
| 2             | 402,172                 | 20,036                               | 5,402                            | 4.31                               | 25.29                               |
| 3             | 333,770                 | 16,874                               | 4,118                            | 4.96                               | 10.45                               |
| 4             | 347,677                 | 22,214                               | 6,236                            | 4.06                               | 18.03                               |
| 5             | 313,668                 | 22,711                               | 4,305                            | 4.06                               | 12.18                               |
| 6             | 1,134,879               | 24,462                               | 5,282                            | 3.71                               | 15.83                               |

<sup>a</sup>Larger than 1000 bp

<sup>b</sup>Among contigs assembled during the corresponding step

<sup>c</sup>Mean coverage of long and short reads produced by Roche 454 and SOLiD, respectively

Supplemental Table 3: Overall retention bias of *Biscutella laevigata* transcripts highlighted by a selection of significantly ( $\alpha= 0.05$ ) over-represented GO categories among unigenes that did not group in gene families (with negative odds-ratios) vs that presented several transcripts (with positive odds-ratios) in gene families.

| GO-slim                                     | Log(odds ratio) |
|---------------------------------------------|-----------------|
| DNA recombination                           | -2.31           |
| DNA dependent DNA replication               | -2.22           |
| DNA repair                                  | -0.79           |
| response to DNA damage stimulus             | -0.75           |
| DNA metabolic process                       | -0.6            |
| response to light stimulus                  | 0.53            |
| response to temperature stimulus            | 0.64            |
| response to UV                              | 0.81            |
| response to osmotic stress                  | 0.9             |
| response to metal ion                       | 0.95            |
| defense response to fungus                  | 0.95            |
| response to salt stress                     | 0.96            |
| response to high light intensity            | 0.98            |
| response to UVB                             | 1.1             |
| regulation of photosynthesis                | 1.41            |
| regulation of photosynthesis light reaction | 1.66            |
| photoinhibition                             | 2.22            |
| postreplication repair                      | 2.44            |

Supplemental Table 4: Genomic blocks of the ancestral crucifer karyotype and corresponding *Arabidopsis thaliana* border BAC clones

| Ancestral chromosome (ACK) | <i>Arabidopsis thaliana</i> |               | Block borders |                                   |
|----------------------------|-----------------------------|---------------|---------------|-----------------------------------|
|                            | chromosome                  | Genomic block | BAC clone     | GenBank Accession                 |
| AK1                        | AT1                         | A             | T25K16        | <a href="#">AC007323</a> - F18014 |
|                            | AT1                         | B             | F6F9          | <a href="#">AC025808</a>          |
|                            | AT1                         | C             | F2J6          | <a href="#">AC023279</a> - F12K21 |
| AK2                        | AT1                         | D             | F13N6         | <a href="#">AC009894</a> - T6H22  |
|                            | AT1                         | E             | T23K8         | <a href="#">AC058785</a> - T12P18 |
|                            | AT3                         | F             | T4P13         | <a href="#">AC010852</a> - F23A5  |
|                            | AT2                         | G             | F16J10        | <a href="#">AC007230</a> - F23A5  |
|                            | AT2                         | H             | T10F5         | <a href="#">AC008261</a> - MWL2   |
| AK3                        | AT2                         | I             | F7024         | <a href="#">AC007289</a> - T25N22 |
|                            | AT2                         | J             | F18A8         | <a href="#">AC007063</a> - F5H14  |
|                            | AT2                         | K             | F2I9          | <a href="#">AC007142</a> - T9J22  |
|                            | AT2                         | L             | K922          | <a href="#">AC003105</a> - T8I3   |
|                            | AT3                         | M             | T10D17        | <a href="#">AC005560</a> - F3C11  |
| AK4                        | AT3                         | N             | F24M12        | <a href="#">AC007167</a>          |
|                            | AT4                         | O             | F6N15         | <a href="#">AF000599</a> - T4A2   |
|                            | AT4                         | P             | T3H13         | <a href="#">AL353865</a> - F3A4   |
|                            | AT5                         | Q             | K8E10         | <a href="#">AL132978</a>          |
|                            | AT5                         | R             | F7J8          | <a href="#">AL132980</a> - F16M2  |
| AK5                        | AT4                         | S             | F5H8          | <a href="#">AF069299</a> - T1J1   |
|                            | AT5                         | T             | TIP17         | <a href="#">AF128396</a> - T4C9   |
|                            | AT5                         | U             | T6K21         | <a href="#">AL080318</a>          |
|                            | AT5                         | V             | MBD2          | <a href="#">AB025618</a> - T8M17  |
|                            | AT5                         | W             | K16F13        | <a href="#">AL137189</a> - T6G21  |
| AK6                        | AT5                         | X             | MUF9          | <a href="#">AL090689</a>          |
|                            | AT4                         | Y             | T6K21         | <a href="#">AB025605</a> - MPK23  |
|                            | AT5                         | Z             | K16F13        | <a href="#">AL049730</a> - F18A5  |
| AK7                        | AT4                         | AA            | T6K21         | <a href="#">AL021889</a> - T5J17  |
|                            | AT5                         | AB            | MBD2          | <a href="#">AB008264</a> - MGC1   |
|                            | AT5                         | AC            | K16F13        | <a href="#">AB024025</a> - K9B18  |
| AK8                        | AT5                         | AD            | MUF9          | <a href="#">AB015471</a>          |
|                            | AT5                         | AE            | MUF9          | <a href="#">AB011483</a> - K9I9   |

**Supporting Analysis: Phylogenetics of gene pairs under whole genome duplications (WGDs)**

Phylogenetic trees for a subset of the analyzed genes confirm that pairs of *Biscutella* transcripts are predominantly derived from the  $\alpha$ -WGD and the BI-m-WGD events.

Duplicated transcripts from *Biscutella laevigata* (BI) and their orthologs from *Arabidopsis thaliana* (At) and the outgroup *Cleome spinosa* (Cs: GenBank LIBEST\_024987) were grouped into gene families and analyzed following the same procedure as detailed in Material and Methods. Among gene families including transcripts from all three species, corresponding ML trees containing BI-duplicates analyzed here were pruned for duplicates showing a maximum Ks=0.9 to focus on loci investigated here. Bayesian inferences were performed in MRBAYES 3.2.2 (<http://mrbayes.sourceforge.net/>) on 159 of the resulting families including one transcript from Cs and at least one transcript from At and two from BI. Using Cs as an outgroup, two independent analyses with four sequentially heated chains (temperature set at 0.02) were run for 10 million generations. The initial 20% of sampled trees were discarded (burn-in) and a tree was sampled every 5000 generations to compute the maximum clade credibility tree. Resulting topologies were sorted, taking uncertainty into account, with the R package APE (<http://ape-package.ird.fr>).

Under the multispecies coalescent and a rooted species tree topology ((BI,At),Cs), the coalescence ages for BI-m-duplicates (BI-1 and BI-2) is expectedly shallower than the speciation of At. Gene evolution under recurrent WGDs thus leads to trees including a topology congruent with the one of the species tree. Among collected trees, this topology occurred twice when all  $\alpha$ - and m-duplicates have been retained (Figure A). Loss of specific duplicates from BI will always lead to trees including this topology (referred to as Topology A). Gene families showing a discrepant topology were further examined. Only differential retention of  $\alpha$ -duplicates between At and BI lead to discordant topologies such as ((BI1,At),BI2),Cs) that match our hypothesis (referred to as Topology B; Figure B). The majority of analyzed gene families (72.3%) presented such topologies congruent with recurrent WGDs. Remaining trees presented variable topologies (an example in Figure C) and revealed genes having unlikely evolved strictly under WGDs. Such cases are collectively referred to as Topology C.

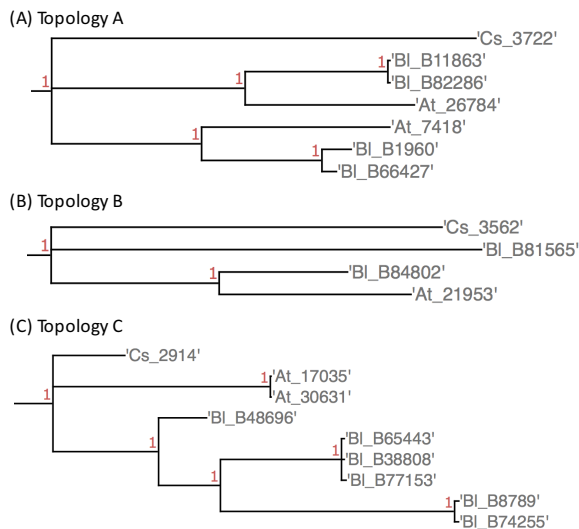

Figure: Examples of gene tree topologies observed among transcripts from *Cleome spinosa* (Cs), *Arabidopsis thaliana* (At) and *Biscutella laevigata* (BI) grouped into gene families. Following our hypothesis of gene duplication through the  $\alpha$ - and, then, the BI-m-WGD events, coalescence of BI-m-duplicates is expectedly shallower than the speciation of At. Corresponding gene trees thus includes a topology congruent with the species tree ((BI,At),CS).

- (A) Topologies congruent with the species tree. This particular example shows all duplicates in both At and BI retained. Loss of a particular At or BI transcript leads to congruent topologies.
- (B) Discrepant topologies matching the species tree. In this case, one of the At- $\alpha$ -duplicates, but not all corresponding BI-duplicates, may have been lost after the  $\alpha$ -WGD event.
- (C) Discrepant topologies failing to be reconciled with the species tree, rejecting gene evolution strictly under recurrent WGDs in BI.

Table: Proportions of the 159 gene families showing phylogenetic trees congruent with the three main topologies presented in the figure and matching the hypothesis of recurrent WGDs

|            | Number of congruent trees | Proportion | Matching hypothesis |
|------------|---------------------------|------------|---------------------|
| Topology A | 86                        | 54.1%      | 72.3%               |
| Topology B | 29                        | 18.2 %     |                     |
| Topology C | 44                        | 27.7%      |                     |
