# Supplementary material
Source: PubMed Central journal article supplement (PMC4746682)
Supplement: supp_tpc.15.00791_TPC2015-00791-RAR1_Supplemental_Data_Set_1.pdf [file supp_tpc.15.00791_TPC2015-00791-RAR1_Supplemental_Data_Set_1.pdf]

| <i>Arabidopsis thaliana</i><br>chromosome | Genomic<br>sub-block | BAC clone | GenBank<br>Accession |
|-------------------------------------------|----------------------|-----------|----------------------|
| AT1                                       | A1                   | T25K16    | AC007323             |
| AT1                                       | A1                   | F6F3      | AC023628             |
| AT1                                       | A1                   | F22L4     | AC061957             |
| AT1                                       | A1                   | T1N6      | AC009273             |
| AT1                                       | A1                   | T6A9      | AC064879             |
| AT1                                       | A1                   | F22D16    | AC009525             |
| AT1                                       | A1                   | F10O3     | AC006550             |
| AT1                                       | A2                   | F15K9     | AC005278             |
| AT1                                       | A2                   | F21B7     | AC002560             |
| AT1                                       | A2                   | F21M11    | AC003027             |
| AT1                                       | A2                   | F20D22    | AC002411             |
| AT1                                       | A2                   | F19P19    | AC000104             |
| AT1                                       | A2                   | T1G11     | AC002376             |
| AT1                                       | A2                   | F13M7     | AC004809             |
| AT1                                       | A3                   | T7A14     | AC005322             |
| AT1                                       | A3                   | T25N20    | AC005106             |
| AT1                                       | A3                   | F3F20     | AC007153             |
| AT1                                       | A3                   | T20M3     | AC009999             |
| AT1                                       | A3                   | T21E18    | AC024174             |
| AT1                                       | A3                   | T2D23     | AC068143             |
| AT1                                       | A4                   | F12K11    | AC007592             |
| AT1                                       | A4                   | F22G5     | AC022464             |
| AT1                                       | A4                   | F24B9     | AC007583             |
| AT1                                       | A4                   | T6D22     | AC026875             |
| AT1                                       | A4                   | T23G18    | AC011438             |
| AT1                                       | A4                   | T27G7     | AC006932             |
| AT1                                       | A4                   | F22O13    | AC003981             |
| AT1                                       | A5                   | F7G19     | AC000106             |
| AT1                                       | A5                   | T12M4     | AC003114             |
| AT1                                       | A5                   | T31J12    | AC006416             |
| AT1                                       | A5                   | F14J9     | AC003970             |
| AT1                                       | A5                   | F21M12    | AC000132             |
| AT1                                       | A5                   | F14N23    | AC005489             |
| AT1                                       | A5                   | F20B24    | AC009398             |
| AT1                                       | A6                   | T16B5     | AC007354             |
| AT1                                       | A6                   | T19D16    | U95973               |
| AT1                                       | A6                   | T23J18    | AC011661             |
| AT1                                       | A6                   | F12F1     | AC002131             |
| AT1                                       | A6                   | T28K15    | AC022522             |
| AT1                                       | A6                   | T12C24    | AC025417             |
| AT1                                       | A7                   | F13K23    | AC012187             |
| AT1                                       | A7                   | F3F19     | AC007357             |
| AT1                                       | A7                   | T6J4      | AC011810             |
| AT1                                       | A7                   | F13B4     | AC027134             |
| AT1                                       | A7                   | F7A19     | AC007576             |
| AT1                                       | A7                   | F14L17    | AC012188             |
| AT1                                       | A8                   | T5E21     | AC010657             |
| AT1                                       | A8                   | F10B6     | AC006917             |
| AT1                                       | A8                   | T15D22    | AC012189             |
| AT1                                       | A8                   | T16N11    | AC013453             |
| AT1                                       | A8                   | F7H2      | AC034256             |
| AT1                                       | A8                   | T24D18    | AC010924             |
| AT1                                       | A8                   | F3O9      | AC006341             |
| AT1                                       | A9                   | F19K19    | AC011808             |
| AT1                                       | A9                   | F17F16    | AC026237             |
| AT1                                       | A9                   | F20D23    | AC007651             |
| AT1                                       | A9                   | T13M22    | AC026479             |
| AT1                                       | A9                   | F1L3      | AC022492             |
| AT1                                       | A9                   | F11A6     | AC034257             |
| AT1                                       | A10                  | T10F20    | AC034107             |
| AT1                                       | A10                  | T10O22    | AC069551             |
| AT1                                       | A10                  | F15H18    | AC013354             |
| AT1                                       | A10                  | F25I16    | AC026238             |
| AT1                                       | A10                  | F14D16    | AC068602             |
| AT1                                       | A10                  | T29M8     | AC069143             |
| AT1                                       | A10                  | F18O14    | AC025808             |
| AT1                                       | E1                   | T23K8     | AC007230             |
| AT1                                       | E1                   | T8F5      | AC004512             |
| AT1                                       | E1                   | F1E22     | AC007234             |
| AT1                                       | E1                   | F12P19    | AC009513             |
| AT1                                       | E1                   | F15E12    | AC026480             |
| AT1                                       | E1                   | T6J19     | AC066691             |
| AT1                                       | E2                   | T27F4     | AC020665             |
| AT1                                       | E2                   | F28G11    | AC074025             |
| AT1                                       | E2                   | T12I7     | AC079285             |
| AT1                                       | E2                   | T4O24     | AC083891             |
| AT1                                       | E2                   | F5A8      | AC004146             |
| AT1                                       | E3                   | F1N21     | AC002130             |
| AT1                                       | E3                   | T1F15     | AC004393             |
| AT1                                       | E3                   | F12B7     | AC011020             |
| AT1                                       | E3                   | F12A21    | AC008113             |
| AT1                                       | E3                   | T23K23    | AC012563             |
| AT1                                       | E3                   | T22E19    | AC016447             |
| AT1                                       | E4                   | T2E12     | AC015986             |
| AT1                                       | E4                   | T26J14    | AC011915             |
| AT1                                       | E4                   | T6L1      | AC011665             |
| AT1                                       | E4                   | F4N2      | AC008262             |
| AT1                                       | E4                   | F10D13    | AC073178             |
| AT1                                       | E5                   | T6C23     | AC013289             |
| AT1                                       | E5                   | F17O7     | AC003671             |
| AT1                                       | E5                   | F17M19    | AC021665             |
| AT1                                       | E6                   | F28P5     | AC069273             |
| AT1                                       | E6                   | T9N14     | AC067754             |
